# Supplementary material
Source: publisher site journal article supplement (https://www.spandidos-publications.com/7602/downloadSupplementary)
Supplement: Supplementary file 1 [file downloadSupplementary]

## Sheet: Sheet1
Table SII. Primer list.
Primer	Direction	Sequence (5'-3')
CYP27A1	Forward	ACCCAGTTTGTGTTCTGCCA
	Reverse	ACCCAGTTTGTGTTCTGCCA
KYNU	Forward	ACCTATGACCTAAGGCTTTTCCA
	Reverse	TAATGCCGTGCGTTGACTCT
GAPDH	Forward	AGGTCGGTGTGAACGGATTTG
	Reverse	TGTAGACCATGTAGTTGAGGTCA
CYP27A1, Cytochrome P450 Family 27 Subfamily A Member 1; KYNU, Kynureninase.
